# Supplementary material
Source: ML conference proceedings conference paper supplement (https://openreview.net/forum?id=cB3OdLInAr9)
Supplement: supplementary_material [file attachment]

# AIT-QA: Question Answering Dataset over Complex Tables in the Airline Industry (Appendix)

## A NeurIPS 2021 Paper Checklist

1. Do the main claims made in the abstract and introduction accurately reflect the paper’s contributions and scope? [Yes]
2. Did you describe the limitations of your work? [Yes] see discussion on type of questions in Section 3
3. Did you discuss any potential negative societal impacts of your work? [N/A] We do not foresee such an impact with this work.
4. Have you read the ethics review guidelines and ensured that your paper conforms to them? [Yes]
5. If you are including theoretical results:
  - (a) Did you state the full set of assumptions of all theoretical results? [N/A]
  - (b) Did you include complete proofs of all theoretical results? [N/A]
6. If you ran experiments (e.g. for benchmarks):
  - (a) Did you include the code, data, and instructions needed to reproduce the main experimental results (either in the supplemental material or as a URL)? [Yes] The introduced AITQA dataset is released at <https://github.com/IBM/AITQA>
  - (b) Did you specify all the training details (e.g., data splits, hyperparameters, how they were chosen)? [Yes] ref to Section 4
  - (c) Did you report error bars (e.g., with respect to the random seed after running experiments multiple times)? [No] Baseline experiment show the proposed dataset is challenging with best accuracy at just 51.8%.
  - (d) Did you include the total amount of compute and the type of resources used (e.g., type of GPUs, internal cluster, or cloud provider)? [Yes] ref to Section 4
7. If you are using existing assets (e.g., code, data, models) or curating/releasing new assets.
  - (a) If your work uses existing assets, did you cite the creators? [N/A]
  - (b) Did you include any new assets either in the supplemental material or as a URL? [Yes] We introduce and release the AITQA dataset at <https://github.com/IBM/AITQA>
  - (c) Did you mention the license of the assets? [Yes] the dataset is under the CDLA-Sharing-1.0 license
  - (d) Did you discuss whether and how consent was obtained from people whose data you’re using/curating? [Yes] The dataset is curated over open public SEC filings data.
  - (e) Did you discuss whether the data you are using/curating contains personally identifiable information or offensive content? [Yes] The dataset does not contain any such content.
8. If you used crowdsourcing or conducted research with human subjects:
  - (a) Did you include the full text of instructions given to participants and screenshots, if applicable? [Yes] The dataset creation process is covered in Section 3.
  - (b) Did you describe any potential participant risks, with links to Institutional Review Board (IRB) approvals, if applicable? [N/A]
  - (c) Did you include the estimated hourly wage paid to participants and the total amount spent on participant compensation? [No] The questions were created by the authors of the paper, no wage was paid.

534 **B Annotation Tool**

535 In figure 2, we present annotation page of our custom table question answering annotation tool.  
536 Annotators were asked to generate question for the given table and annotate various properties of the question like whether the question is KPI-driven or table-driven etc.

TU Labeling Tool

Question Count  
15

Upload file

Download labeled document

Question Source: Dependence on Row Header Hierarchy: Paraphrasing: Add Question

Question: What were the available seat miles of American Airlines in 2018?  
Answer: 282,054  
Properties: [Question Source: 'KPI-driven', Dependence on Row Header Hierarchy: 'No', ]  
Annotator:

Question: What was American's regional cost of fuel per ASM in 2019?  
Answer: (0.66)  
Properties: [Question Source: 'KPI-driven', Dependence on Row Header Hierarchy: 'Yes', ]  
Annotator:

|                                                                                                                     | Year Ended December 31, |           |
|---------------------------------------------------------------------------------------------------------------------|-------------------------|-----------|
|                                                                                                                     | 2019                    | 2018      |
| <b>Reconciliation of Total Operating Costs per Available Seat Mile (CASM) Excluding Net Special Items and Fuel:</b> |                         |           |
| (In millions)                                                                                                       |                         |           |
| Total operating expenses - GAAP                                                                                     | \$ 42,703               | \$ 41,885 |
| Operating net special items <sup>(1)</sup> :                                                                        |                         |           |
| Mainline operating special items, net                                                                               | (635)                   | (787)     |
| Regional operating special items, net                                                                               | (6)                     | (6)       |
| Fuel:                                                                                                               |                         |           |
| Aircraft fuel and related taxes - mainline                                                                          | (7,526)                 | (8,053)   |
| Aircraft fuel and related taxes - regional                                                                          | (1,869)                 | (1,843)   |
| Total operating expenses, excluding net special items and fuel                                                      | \$ 32,667               | \$ 31,196 |
| (In millions)                                                                                                       |                         |           |
| Total Available Seat Miles (ASM)                                                                                    | 285,088                 | 282,054   |
| (In cents)                                                                                                          |                         |           |
| Total operating CASM                                                                                                | 14.98                   | 14.85     |
| Operating net special items per ASM <sup>(1)</sup> :                                                                |                         |           |
| Mainline operating special items, net                                                                               | (0.22)                  | (0.28)    |
| Regional operating special items, net                                                                               | —                       | —         |
| Fuel per ASM:                                                                                                       |                         |           |
| Aircraft fuel and related taxes - mainline                                                                          | (2.64)                  | (2.86)    |
| Aircraft fuel and related taxes - regional                                                                          | (0.66)                  | (0.65)    |
| Total CASM, excluding net special items and fuel                                                                    | 11.46                   | 11.08     |

<sup>(1)</sup> See Note 2 to AAG's Consolidated Financial Statements in Part II, Item 8A for further information on net special items.

47

**Selected Consolidated Financial Data of American**  
The selected consolidated financial data presented below under the captions "Consolidated Statements of Operations data" and "Consolidated Balance Sheet data" for the years ended December 31, 2019, 2018, 2017, 2016 and 2015 are derived from American's audited consolidated financial statements.

Figure 2: Annotating questions for a table using custom annotation tool

537
